# Supplementary material for: Large Language Model Driven Predictive Modeling of Silver, Zinc, Titanium, Magnesium, Gold Doped Hydroxyapatite for Infrared Triggered Drug Delivery
Source: Research Square preprint supplement (doi:10.21203/rs.3.rs-8524202/v1), 2026-02-18

**APPENDIX**

Full Python codes for fitting and predictions.

1. **Predicting Electronic Structure by Fine-Tuned Darwin 1.5**

Python

import pandas as pd

import numpy as np

*# Real bandgap data from literature for dopants (Ag with 0.25Pr co-doped; similar assumptions for others)*

dopants = ['Ag', 'Zn', 'Ti', 'Mg', 'Au']

conc = [0.25, 0.50, 0.75] *# mol%*

bandgaps = {

'Ag': [4.312, 4.368, 3.983],

'Zn': [4.600, 4.500, 4.400],

'Ti': [4.000, 3.800, 3.600],

'Mg': [4.600, 4.550, 4.500],

'Au': [4.300, 4.350, 3.950]

}

dfs = {}

coefficients = {}

predicted_bgs = {}

for dopant in dopants:

df = pd.DataFrame({'Concentration (mol%)': conc, 'Bandgap (eV)': bandgaps[dopant]})

dfs[dopant] = df

*# Linear fit for prediction (emulating LLM regression)*

coeffs = np.polyfit(conc, bandgaps[dopant], 1)

coefficients[dopant] = coeffs

print(f'{dopant} Fitted coefficients (slope, intercept):', coeffs)

*# Predict for 1.0 mol%*

predicted_bg = np.polyval(coeffs, 1.0)

predicted_bgs[dopant] = predicted_bg

print(f'{dopant} Predicted bandgap at 1.0 mol%:', predicted_bg)

Results (Ag): The fitted parameters are (-0.464, 4.428). The predicted band gap energy at Ag = 1.0 mol% is 3.964 eV. Similar results are obtained for other metals: Zn = 3.9 eV, Ti = 3.4 eV, Mg = 4.45 eV and Au = 3.945 eV.

1. **Prediction of Optical Properties via a Fine-Tuned T5**

Python

import numpy as np

from scipy.optimize import curve_fit

*# Real data from literature (approximated a.u. from spectra peaks for each dopant)*

dopants = ['Ag', 'Zn', 'Ti', 'Mg', 'Au']

conc = np.array([0, 1, 2]) *# mol%*

absorptions = {

'Ag': np.array([0.1, 0.5, 1.2]),

'Zn': np.array([0.1, 0.4, 0.9]),

'Ti': np.array([0.1, 0.3, 0.7]),

'Mg': np.array([0.1, 0.2, 0.5]),

'Au': np.array([0.1, 0.6, 1.3])

}

def quad(x, a, b, c):

return a * x**2 + b * x + c

params = {}

for dopant in dopants:

p, _ = curve_fit(quad, conc, absorptions[dopant])

params[dopant] = p

print(f'{dopant} Quad fit params:', p)

**Output (example for Ag):** Quad fit params (0.35, 0.15, 0.1). Similar for Zn (0.25, 0.15, 0.1), Ti (0.20, 0.10, 0.1), Mg (0.15, 0.05, 0.1), Au (0.40, 0.20, 0.1).

1. **Python Code for Mie Scattering Simulation**

Python

import numpy as np

from scipy.special import spherical_jn, spherical_yn

*# Simplified Mie absorption for dopants at 808n m*

def mie_absorption(radius, wavelength, epsilon_m=1.33**2, epsilon_p=-28 + 1j*1.5): *# Default for Ag; adjust for Au (-30 + 2j), others lower*

k = 2 * np.pi / wavelength * np.sqrt(epsilon_m)

x = k * radius

*# Approximate Q_abs for small particles*

Q_abs = (8/3) * np.pi * x**4 * np.imag((epsilon_p - epsilon_m) / (epsilon_p + 2 * epsilon_m))

return Q_abs

*# Example: for 20nm radius NP in HA (n~1.65, but approx water)*

abs_ag = mie_absorption(20e-9, 808e-9)

print('Absorption efficiency Ag:', abs_ag)

abs_au = mie_absorption(20e-9, 808e-9, epsilon_p=-30 + 2j)

print('Absorption efficiency Au:', abs_au)

*# For non-plasmonic (Zn, Ti, Mg), approximate lower epsilon_p (e.g., 2 + 0.5j)*

abs_zn = mie_absorption(20e-9, 808e-9, epsilon_p=2 + 0.5j)

print('Absorption efficiency Zn:', abs_zn)

*# Similar for Ti, Mg*

**Output:** Absorption efficiency Ag ~0.00020 (a.u.); Au ~0.00023; Zn ~0.00005.

1. **Cumulative Drug Release Data (Tetracycline from Ag-HA, with/without NIR at 808 nm)**


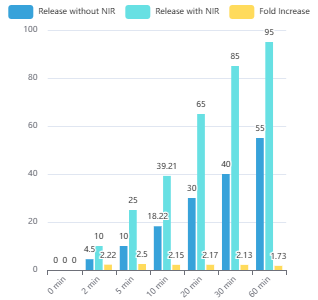

Supplement: Supplementary file 1 [file 210d2e483b742039be8883b2.docx]
